# Supplementary material for: Human Health Risk Assessment of Trace Elements in Tap Water and the Factors Influencing Its Value
Source: MDPI journal article supplement (doi:10.3390/min11111291), 2021-11-20
Supplement: s1 [file s1]

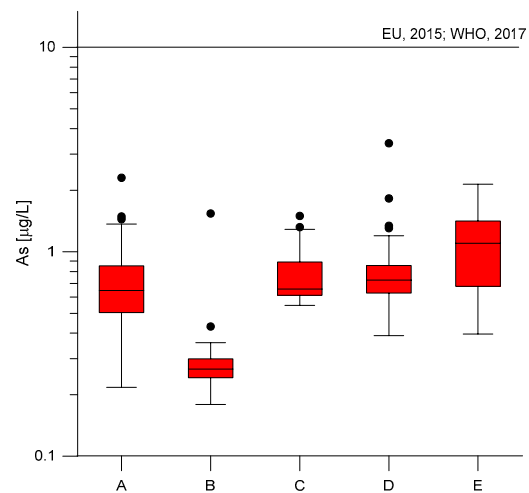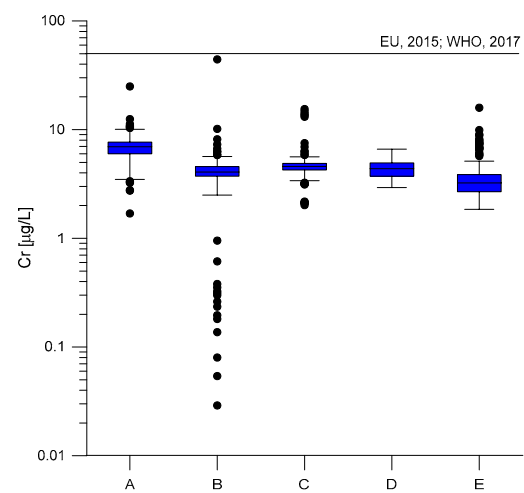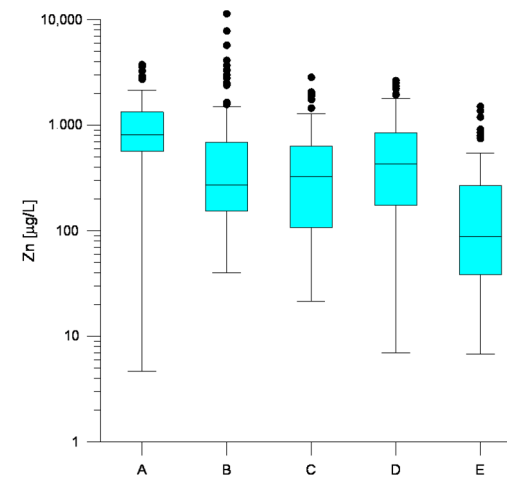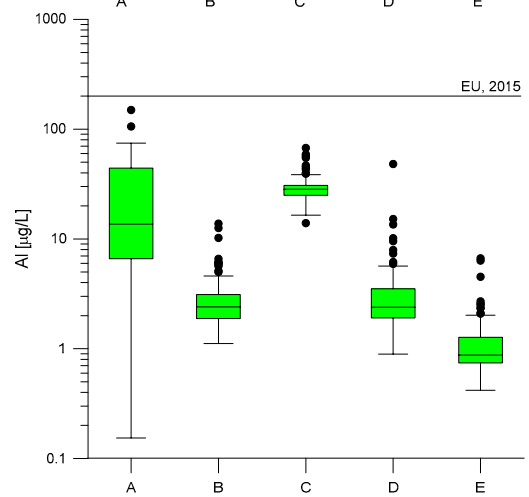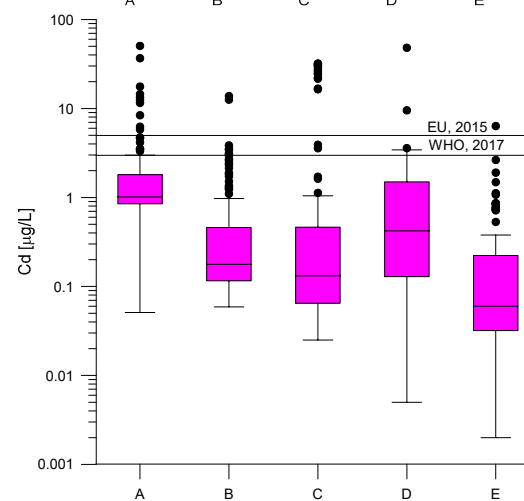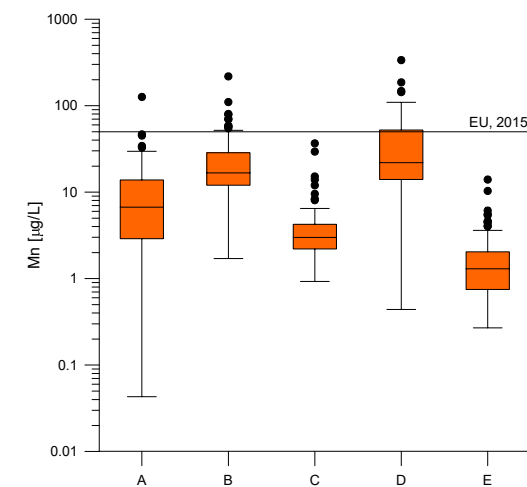

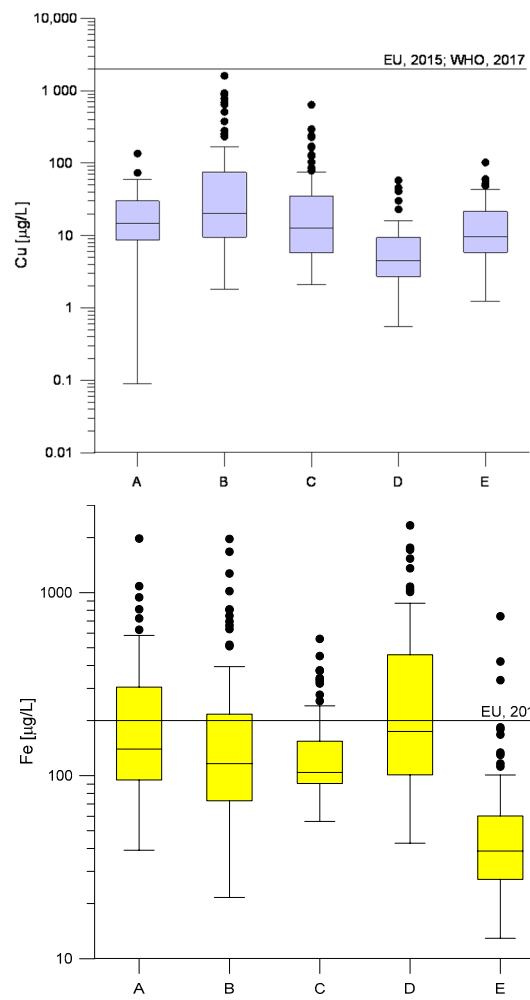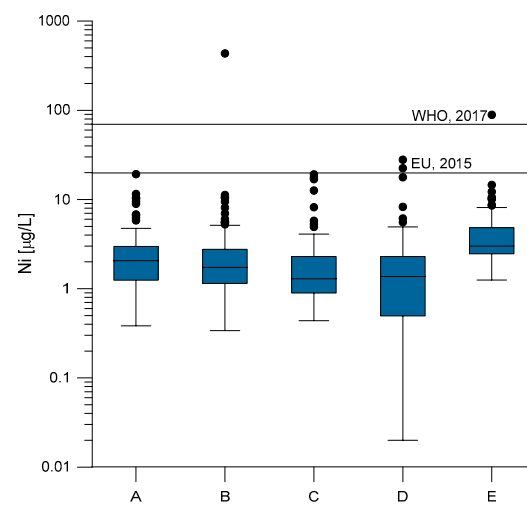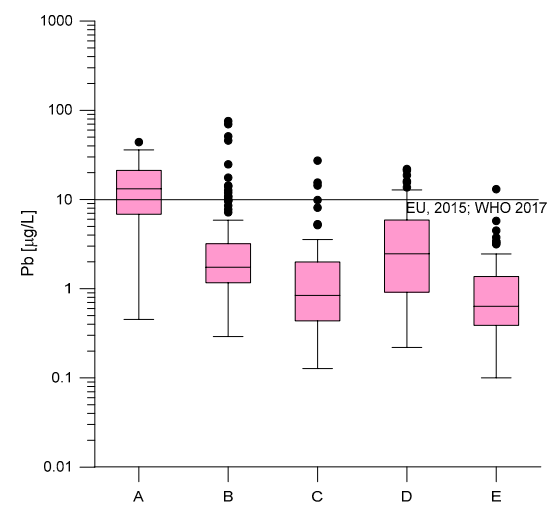

(a)

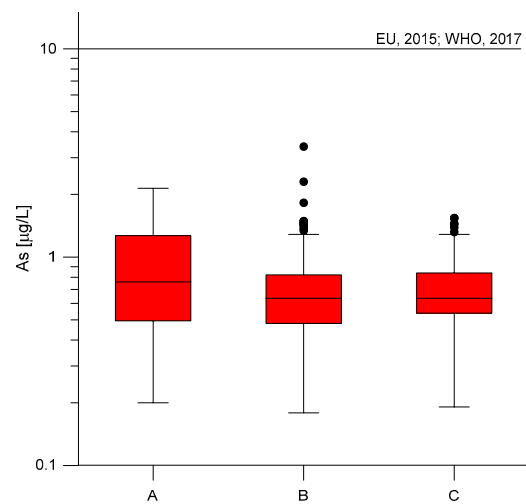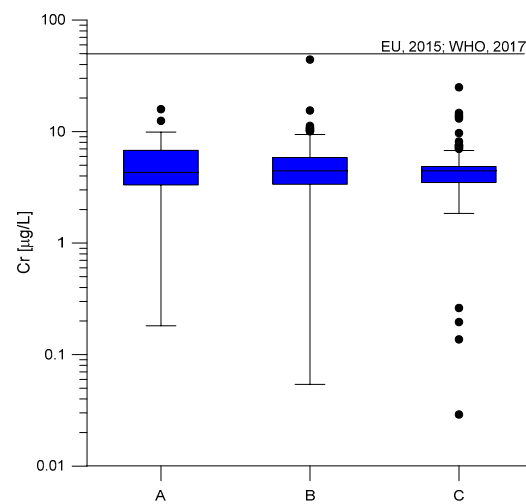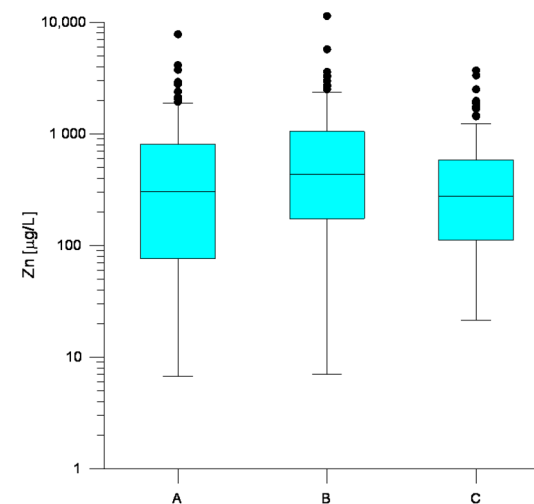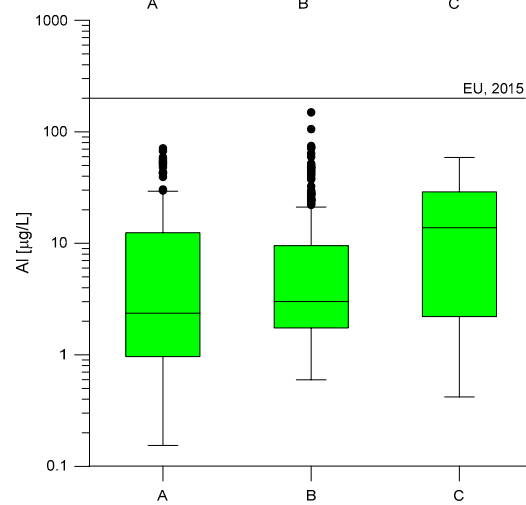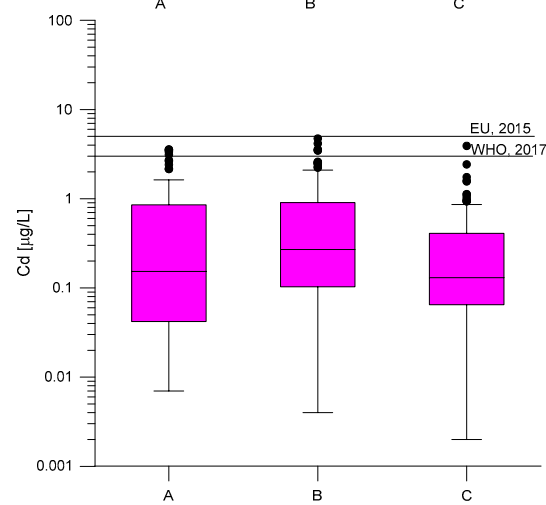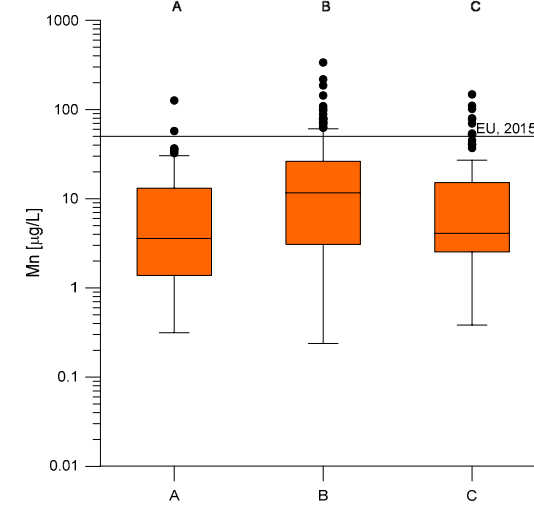

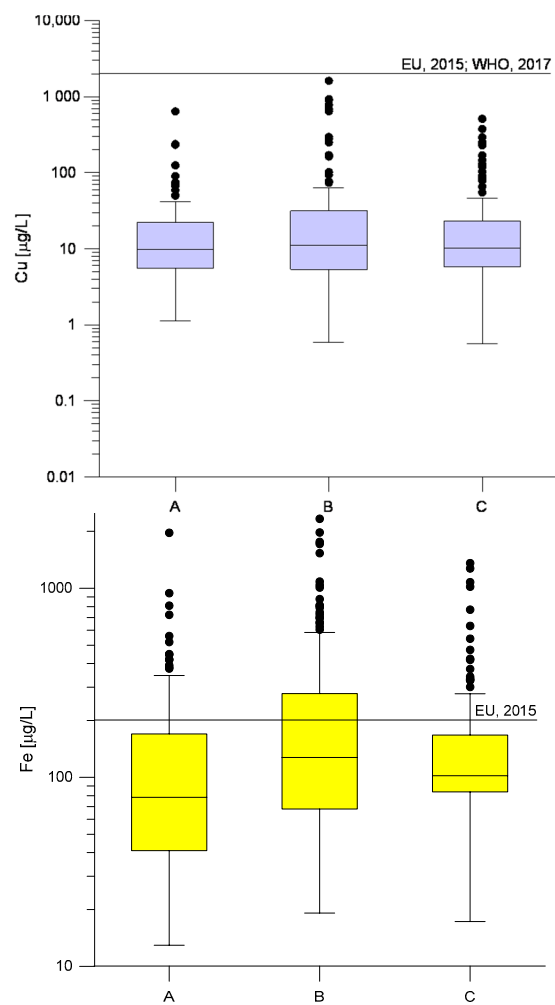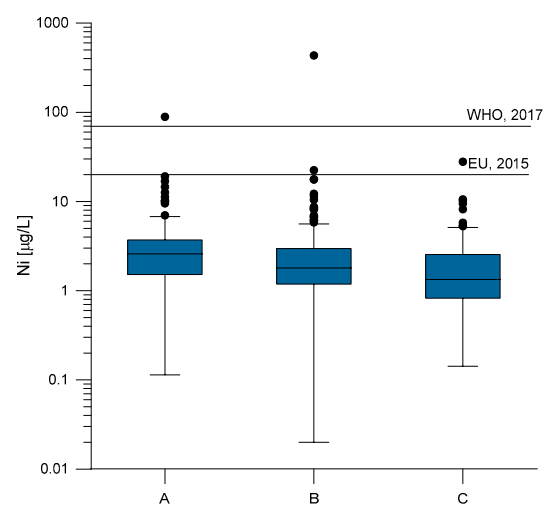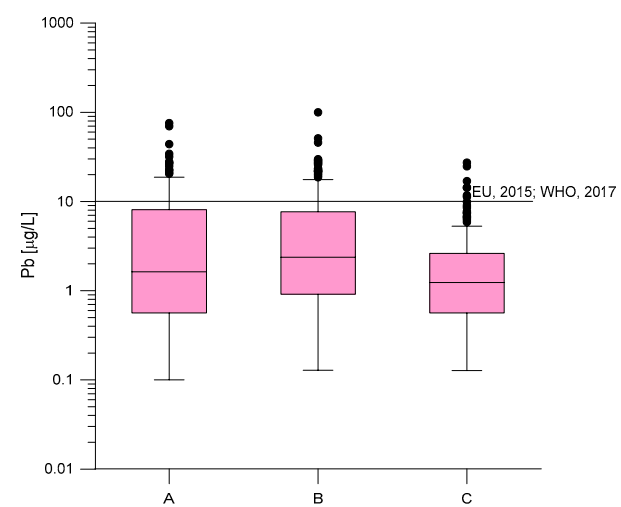

(b)

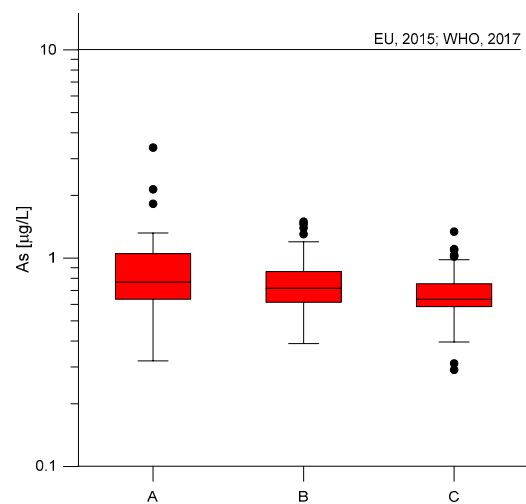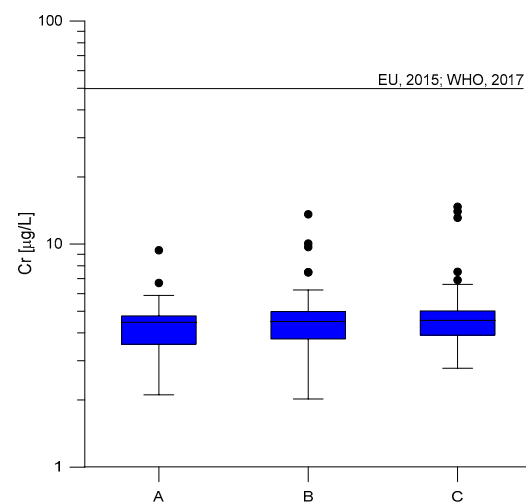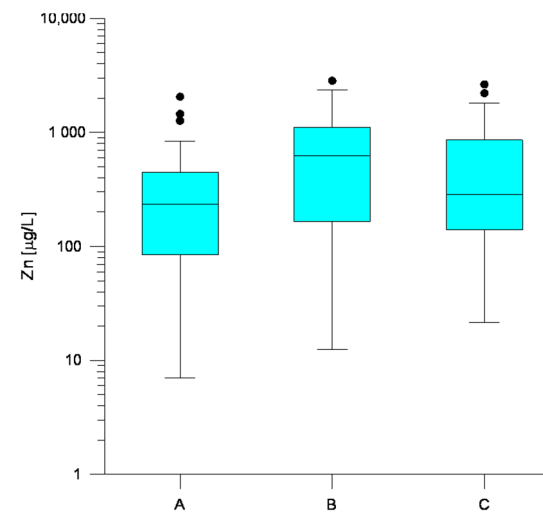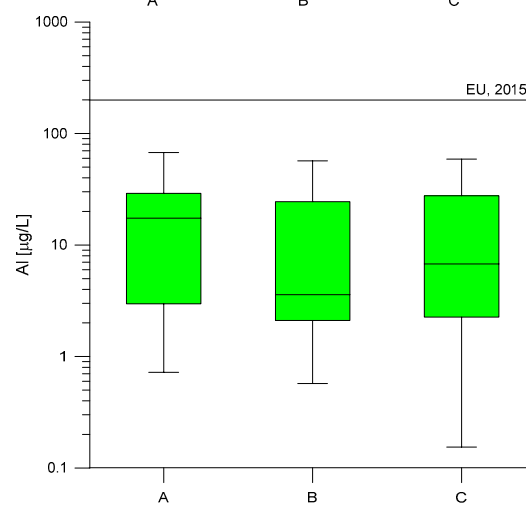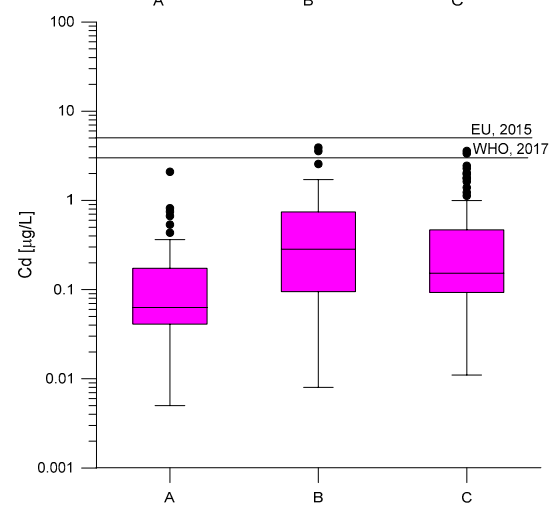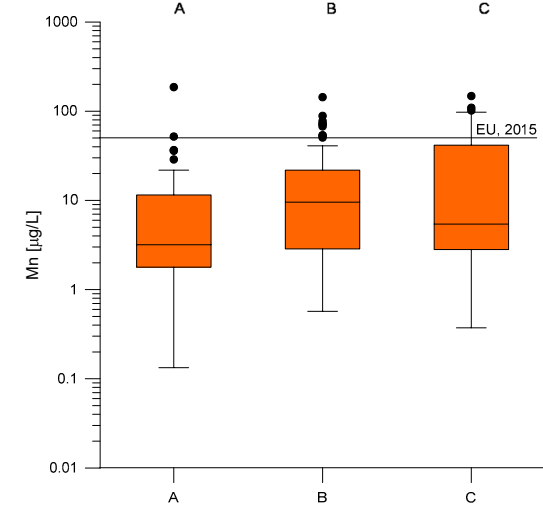

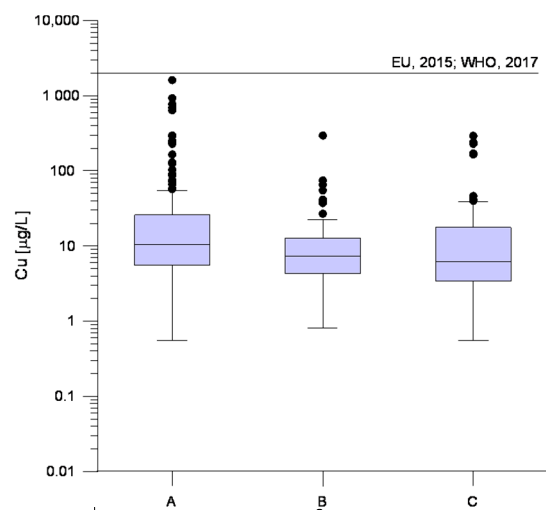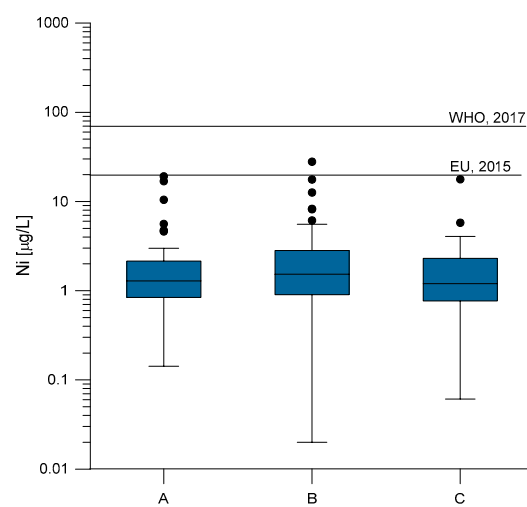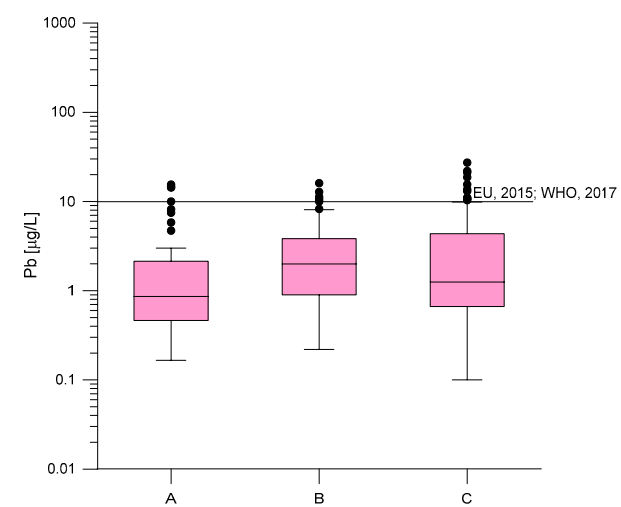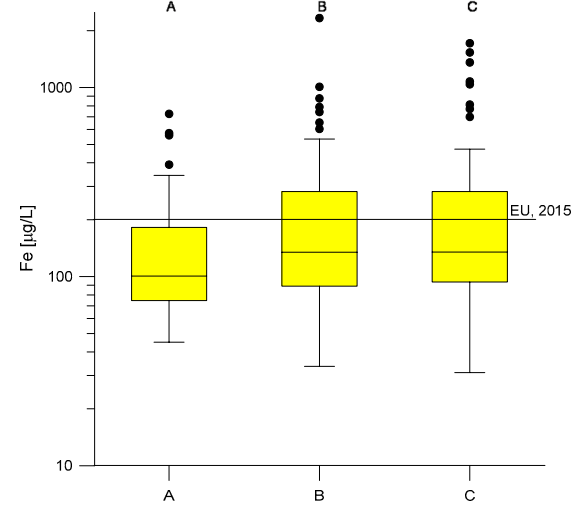

(c)

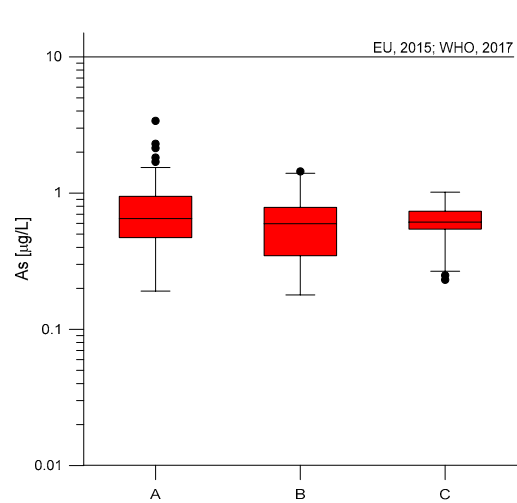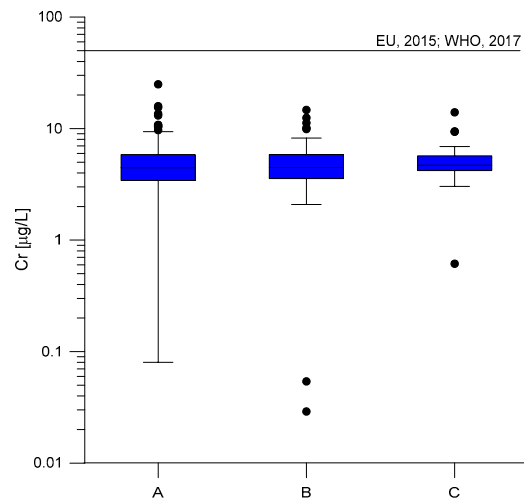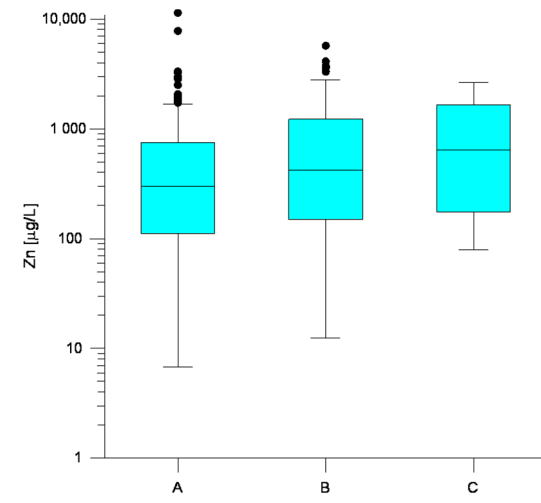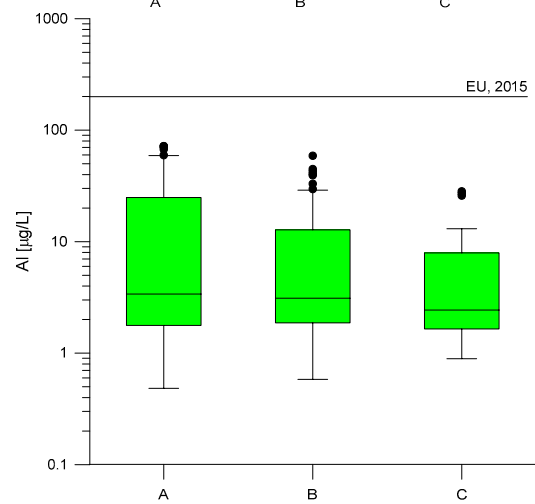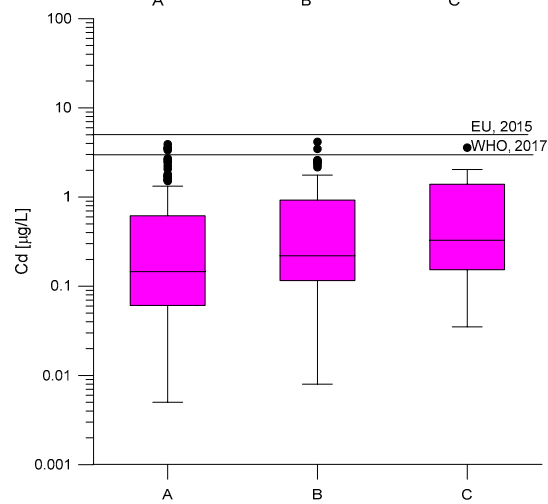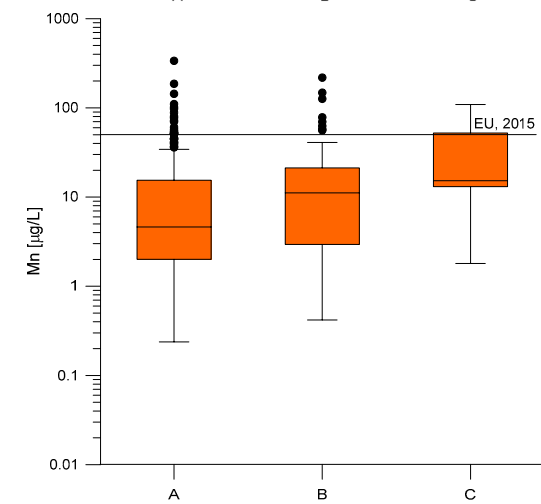

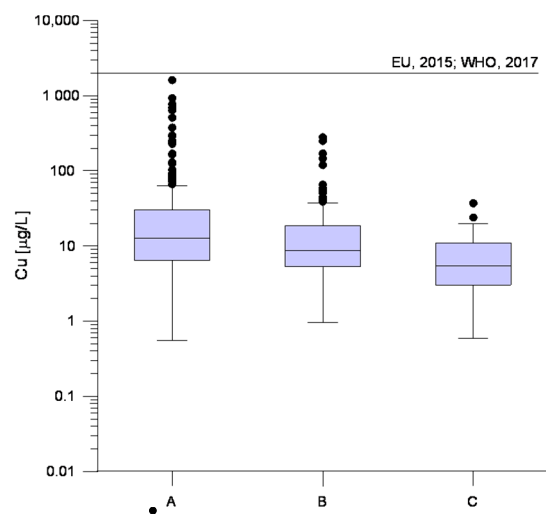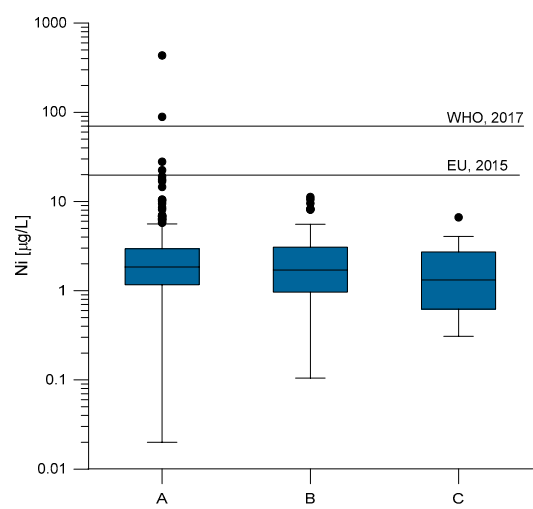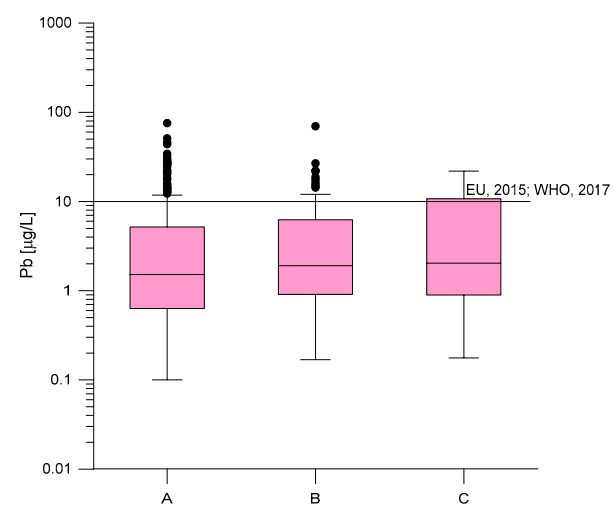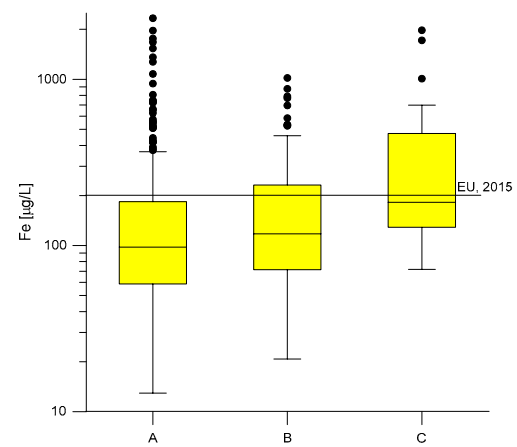

(d)



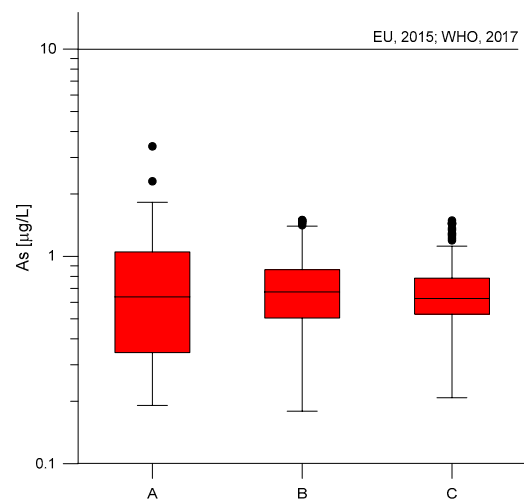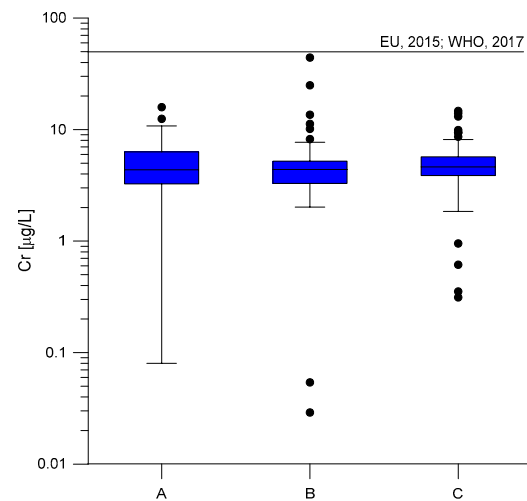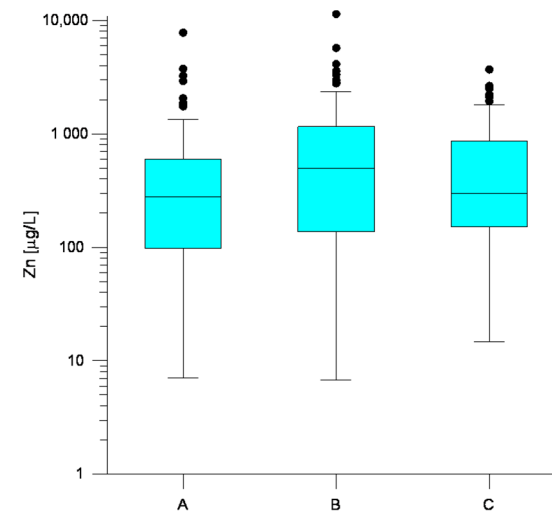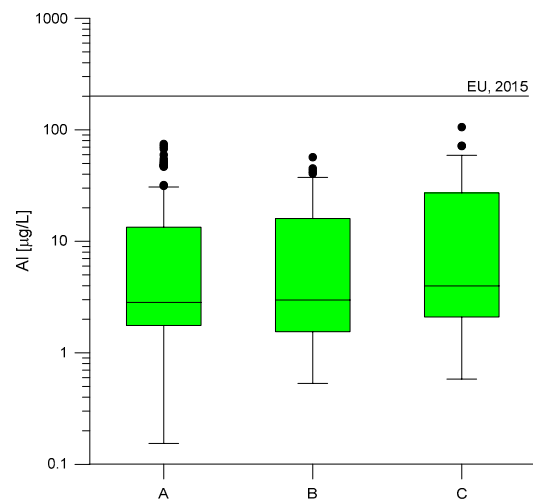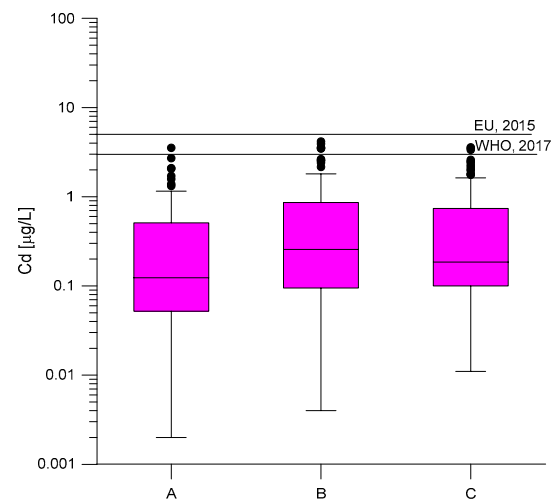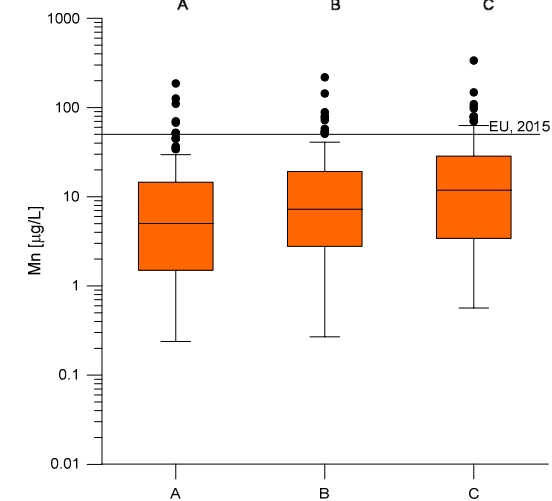

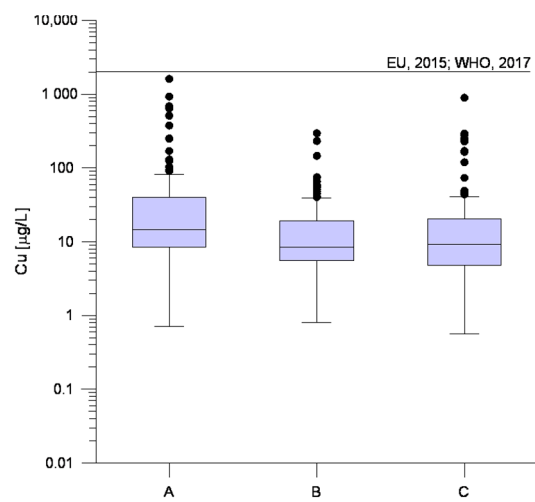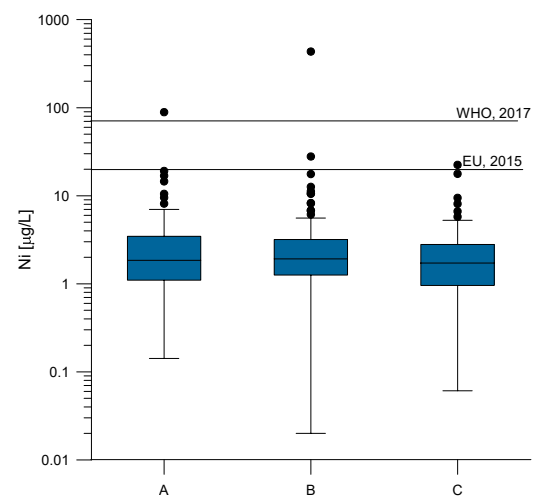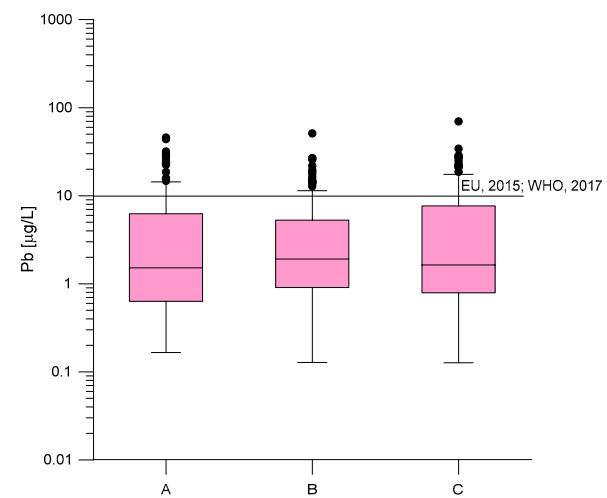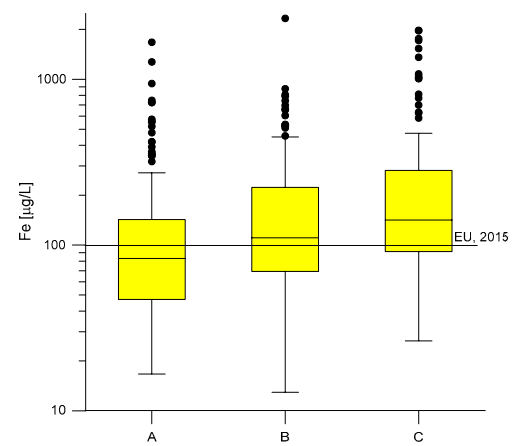

(e)

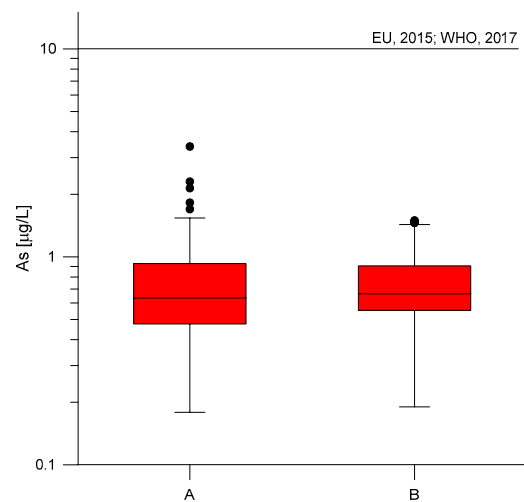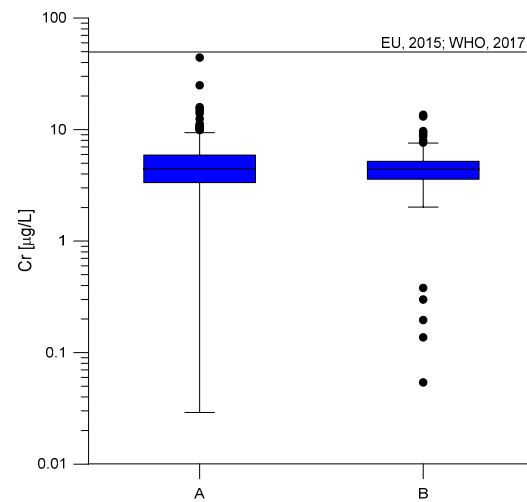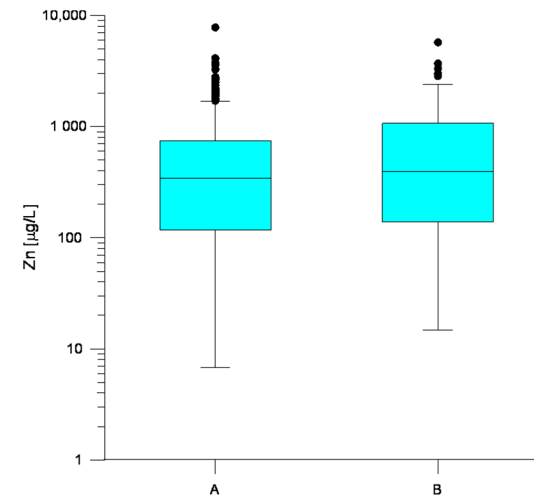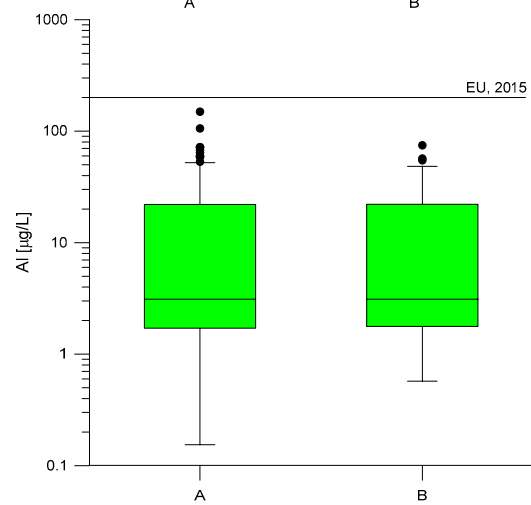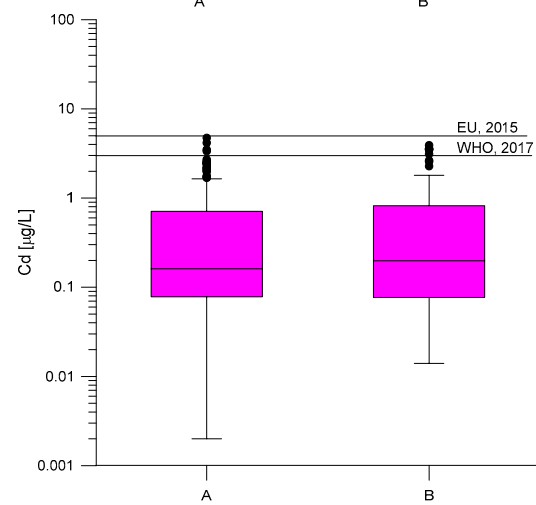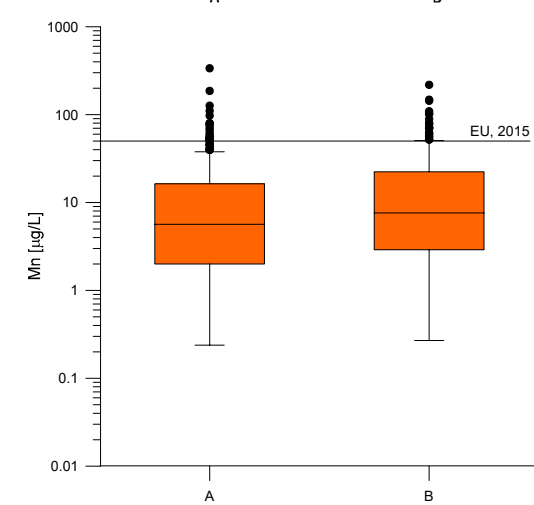

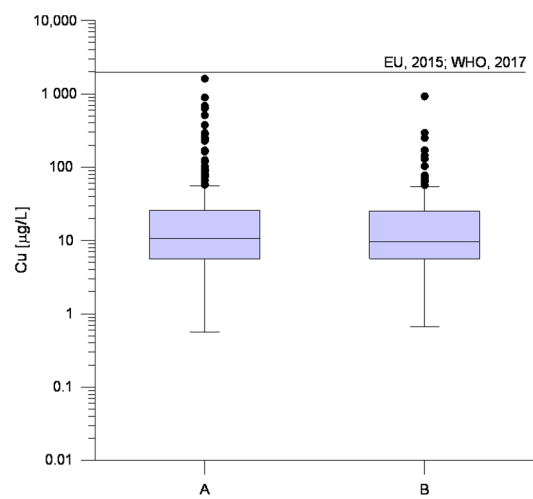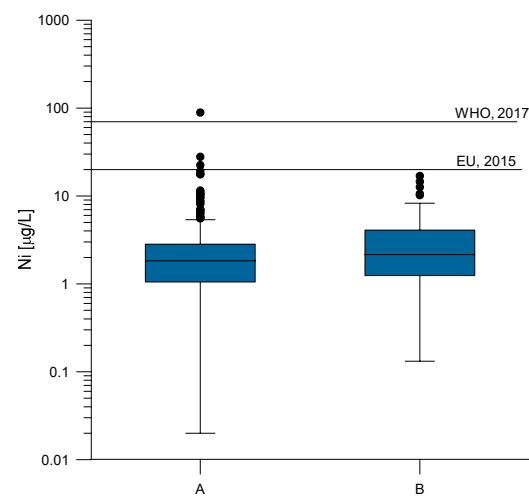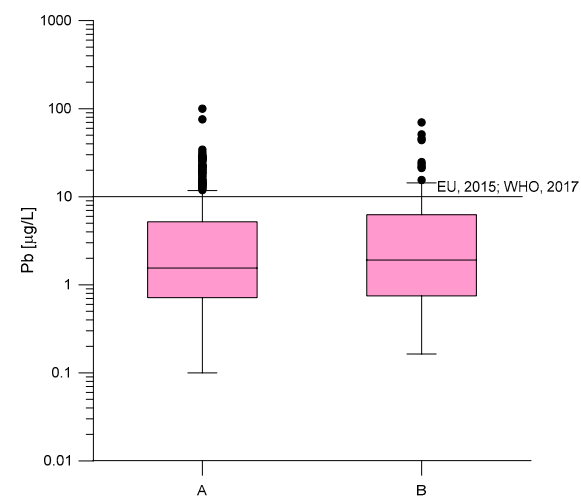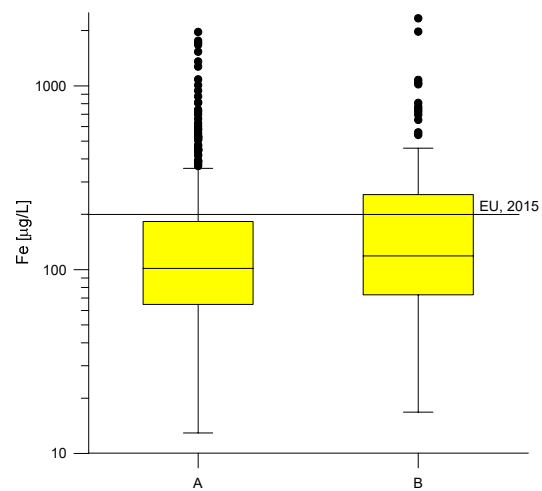

(f)

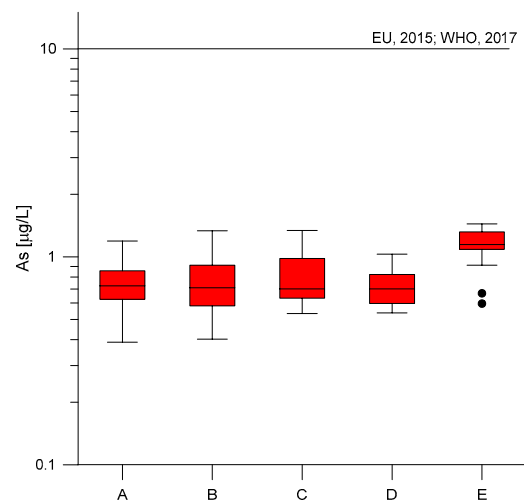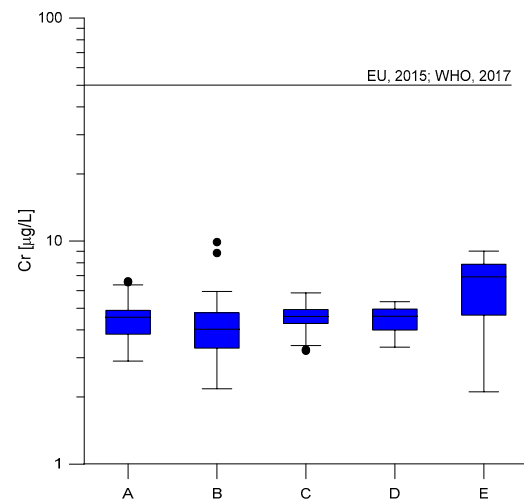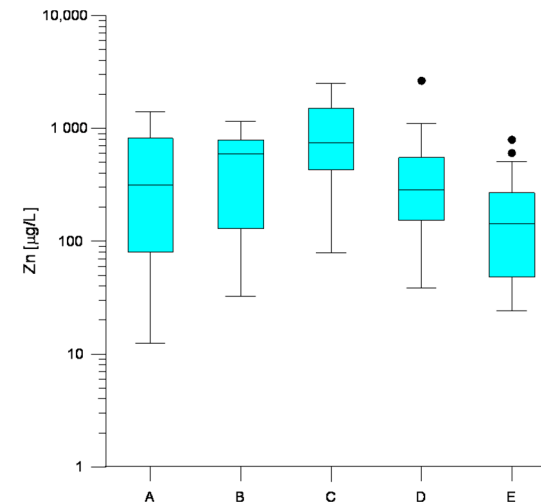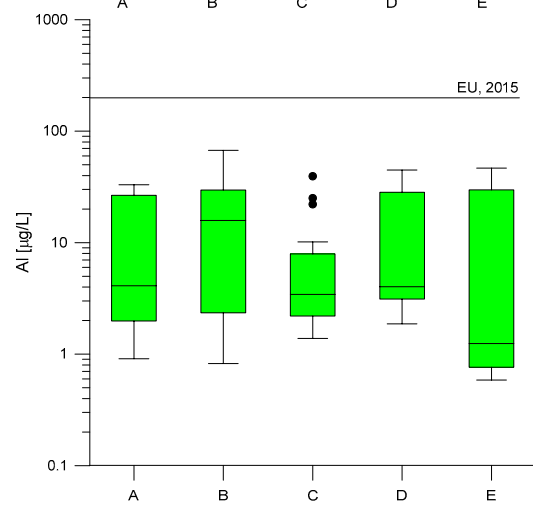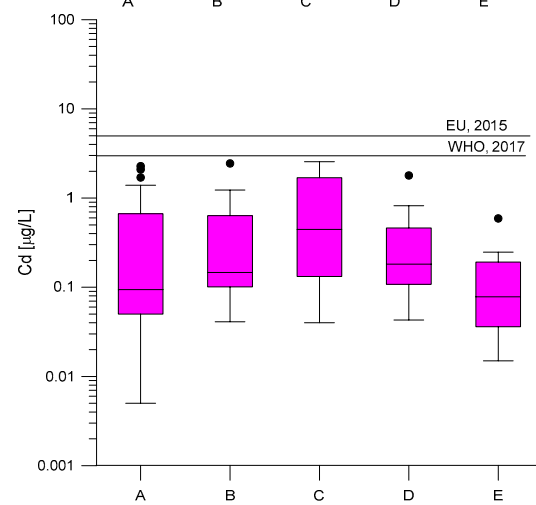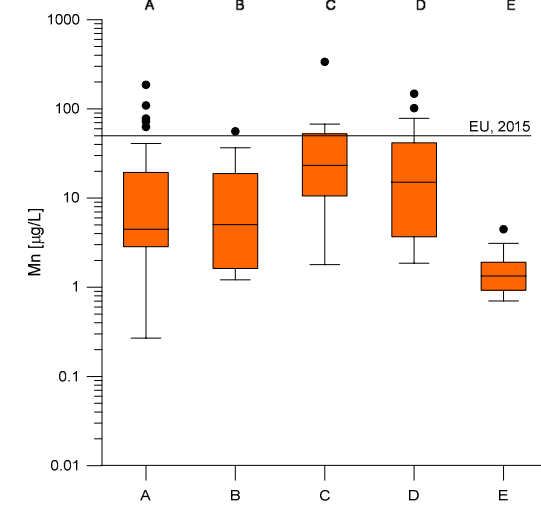

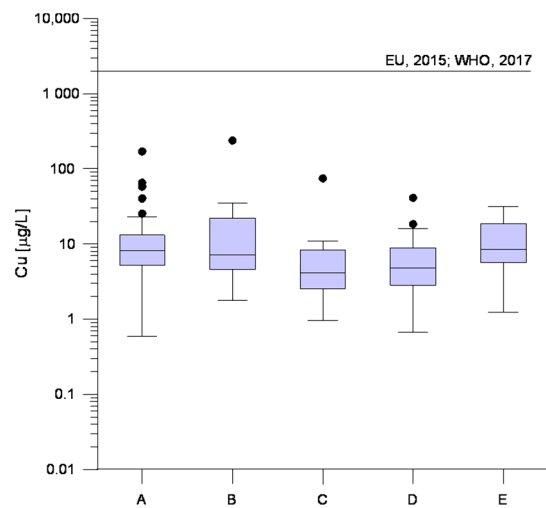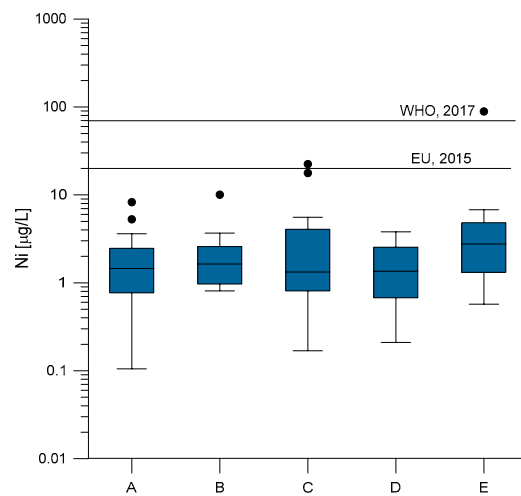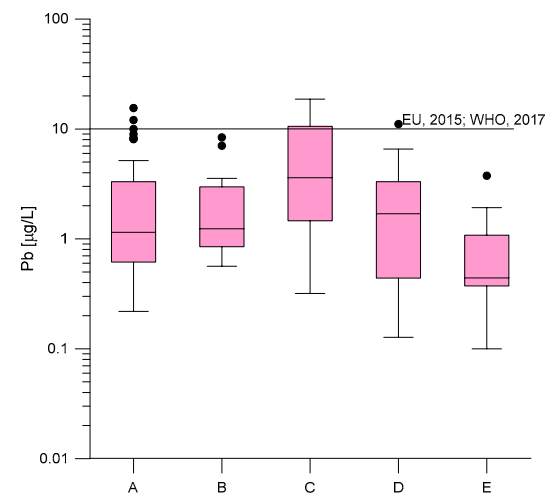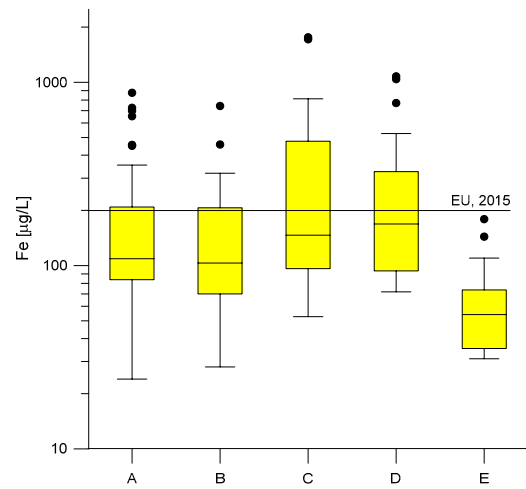

(g)

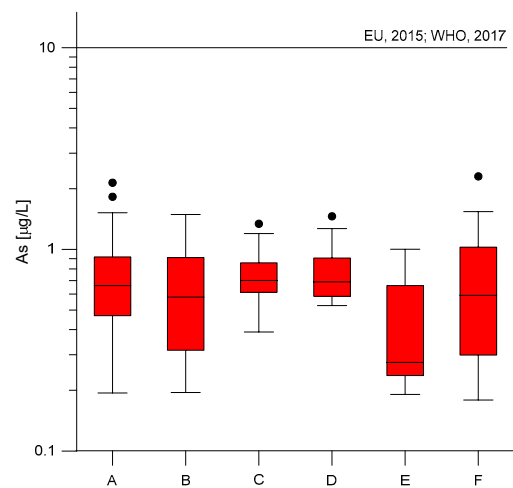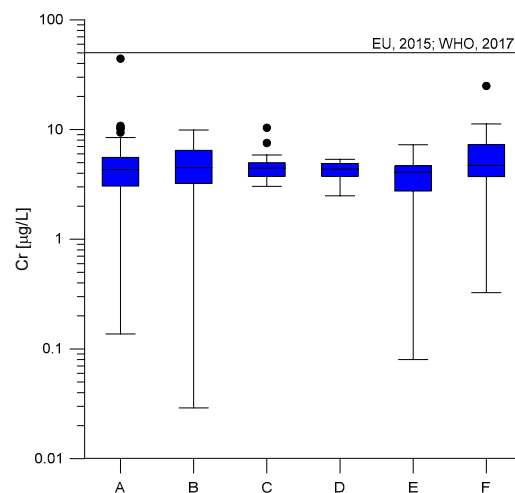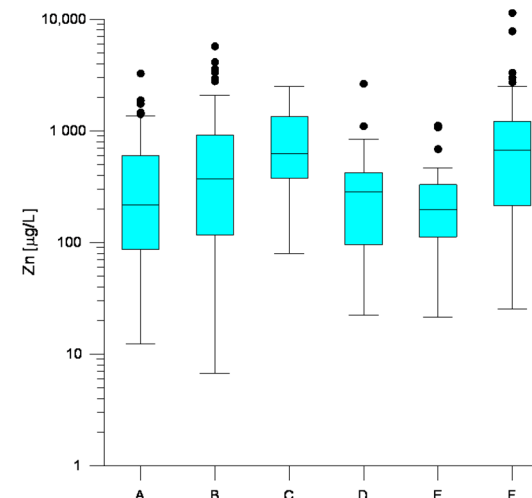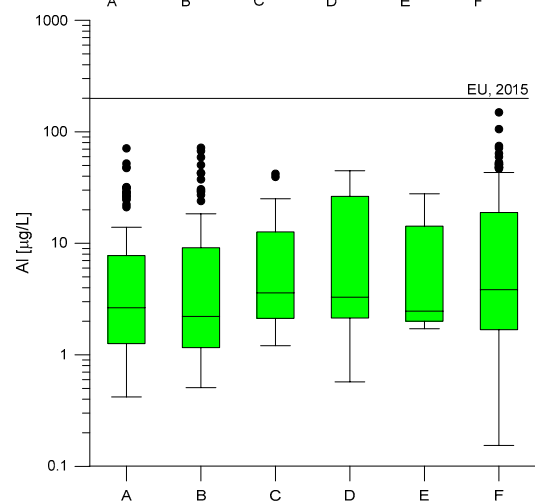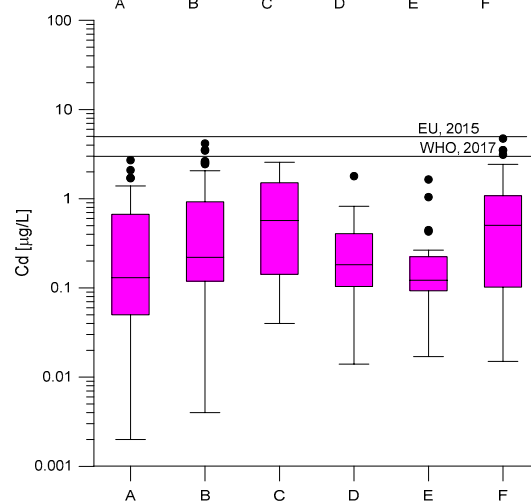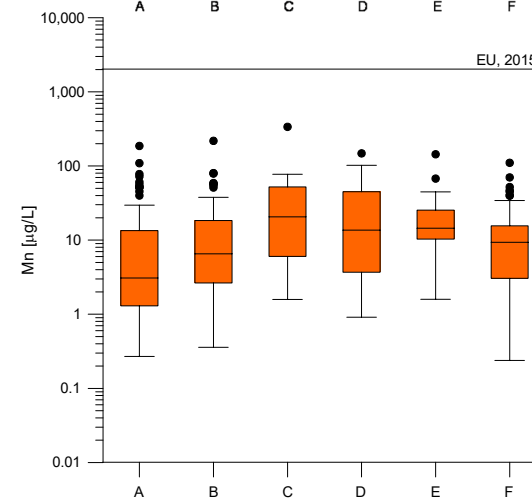

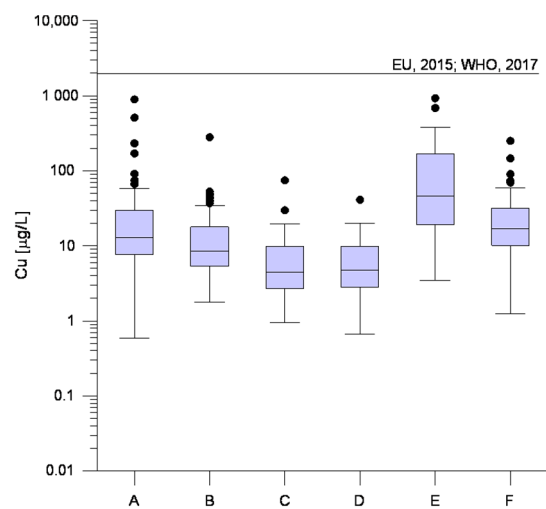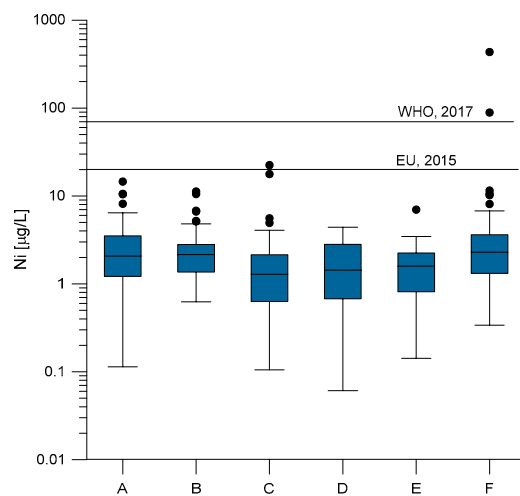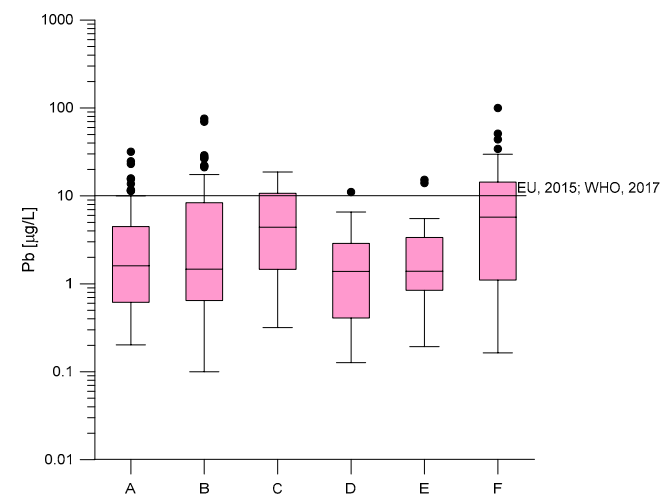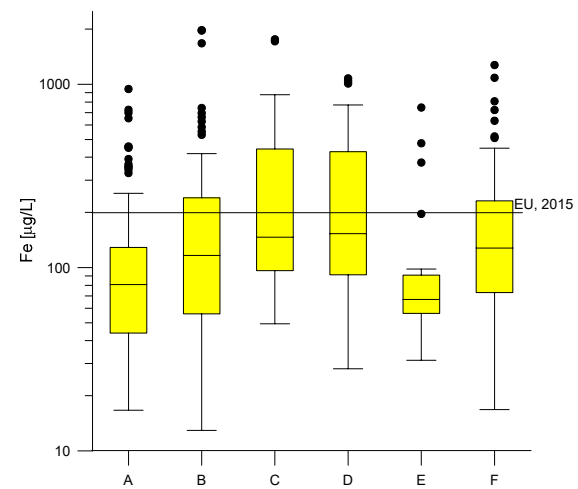

(h)



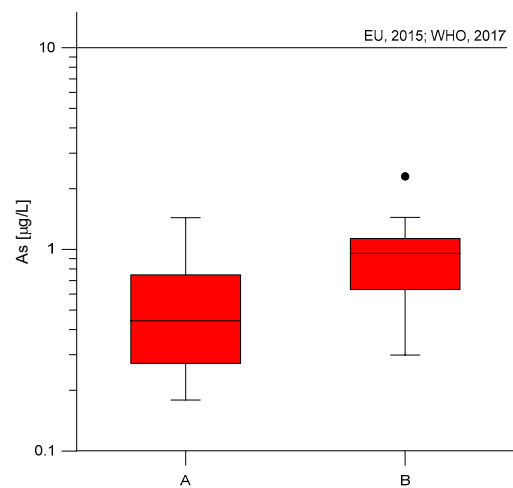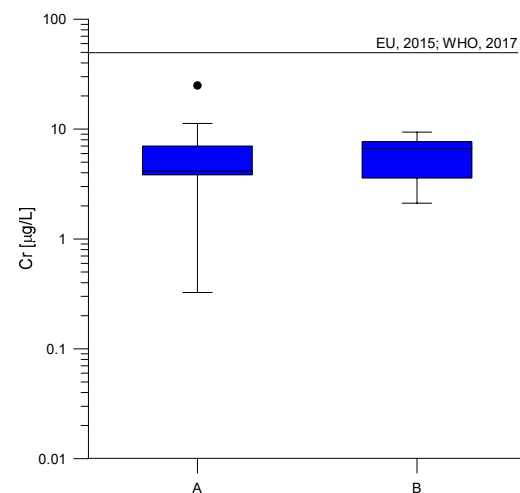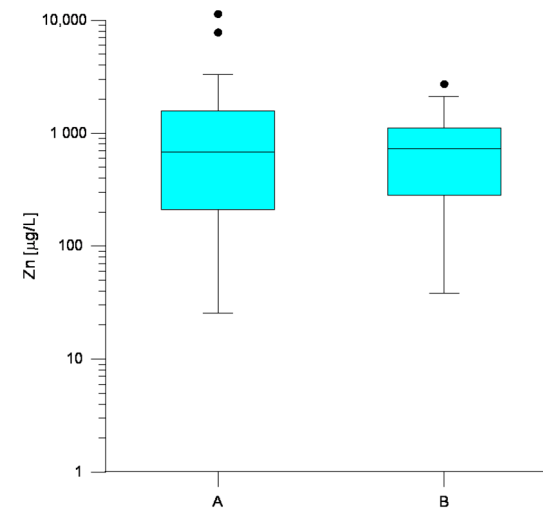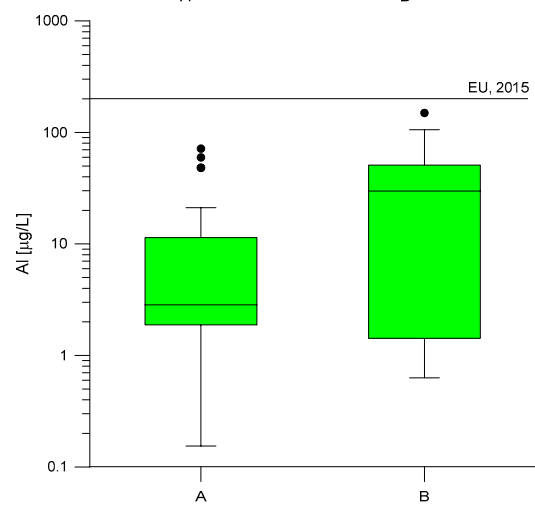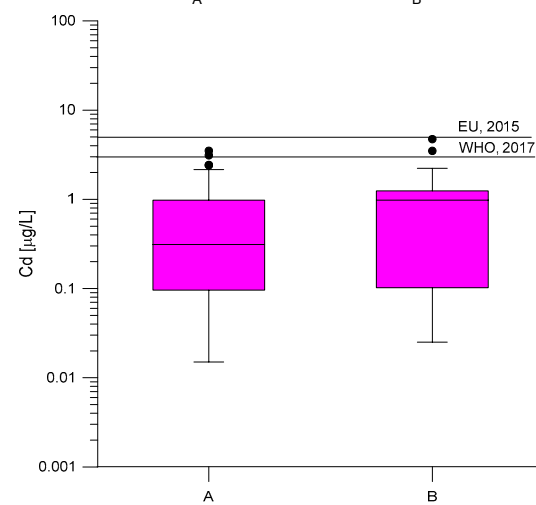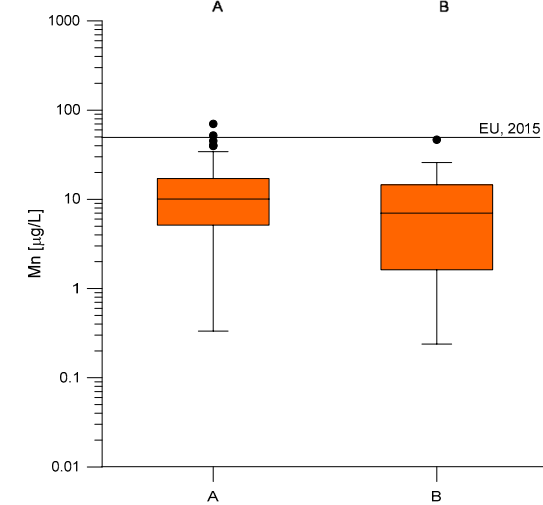

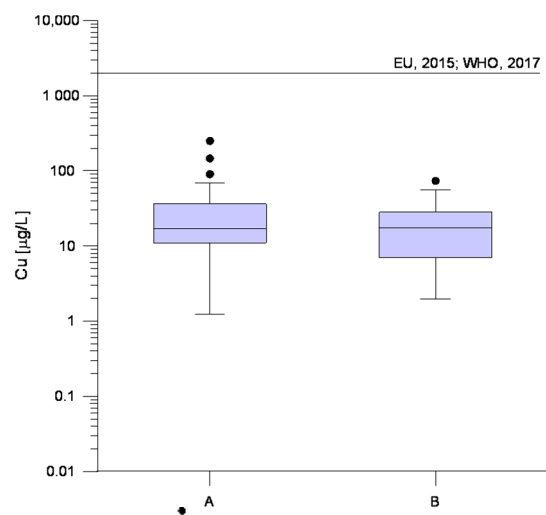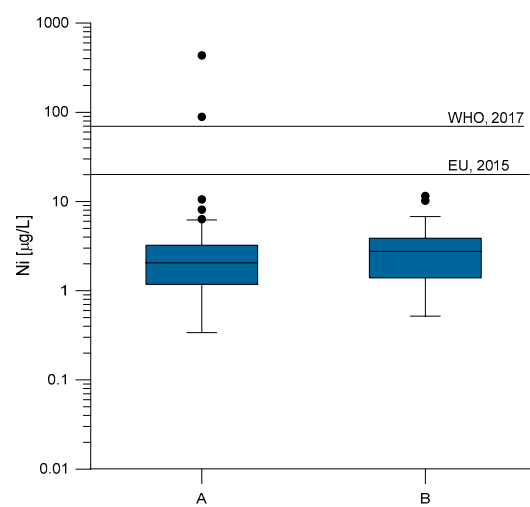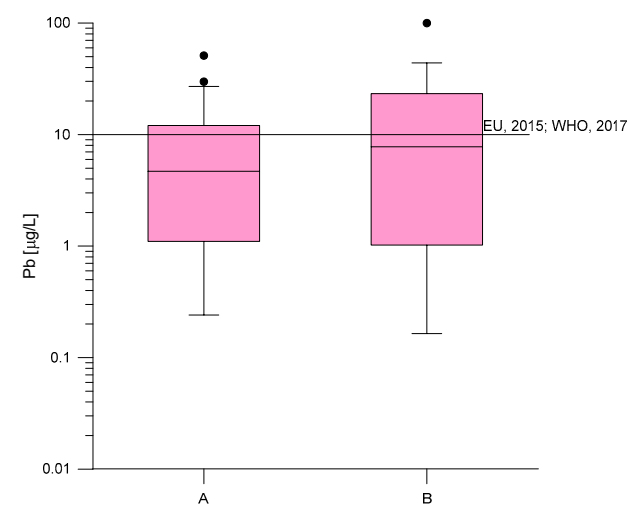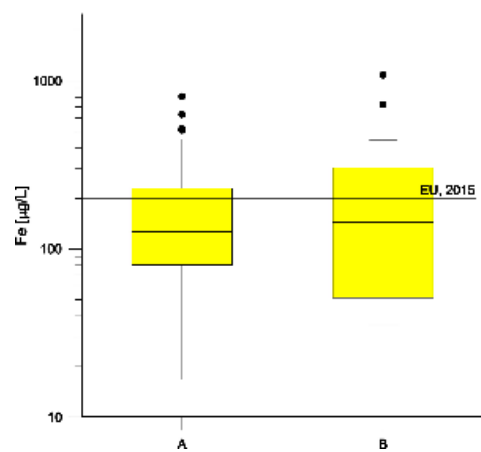

(i)

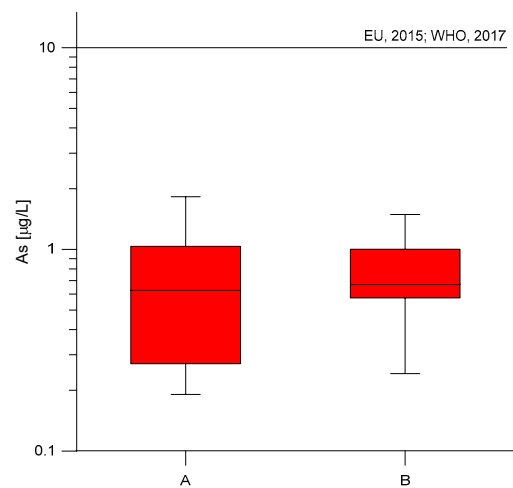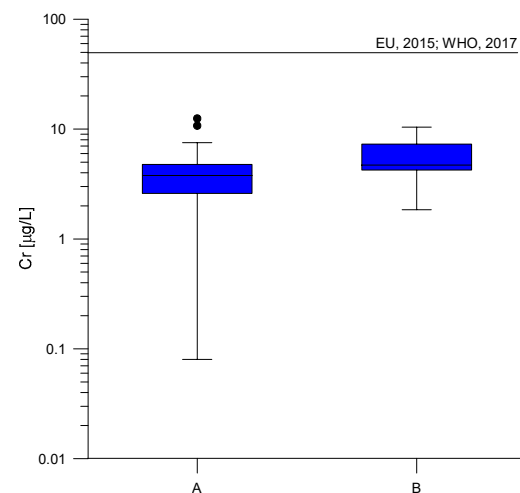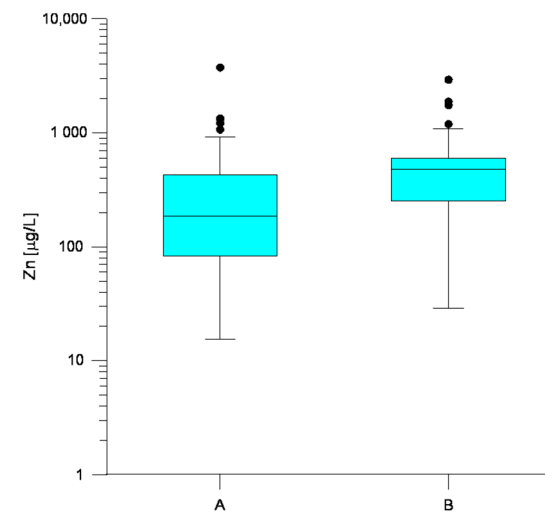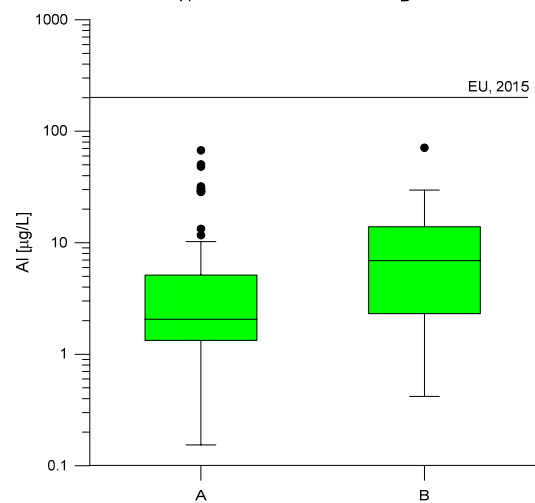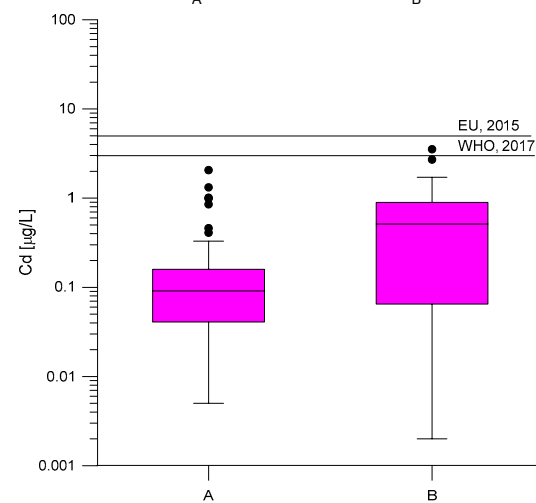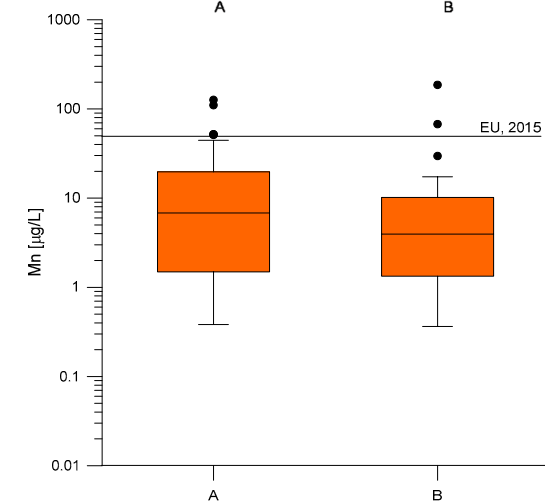

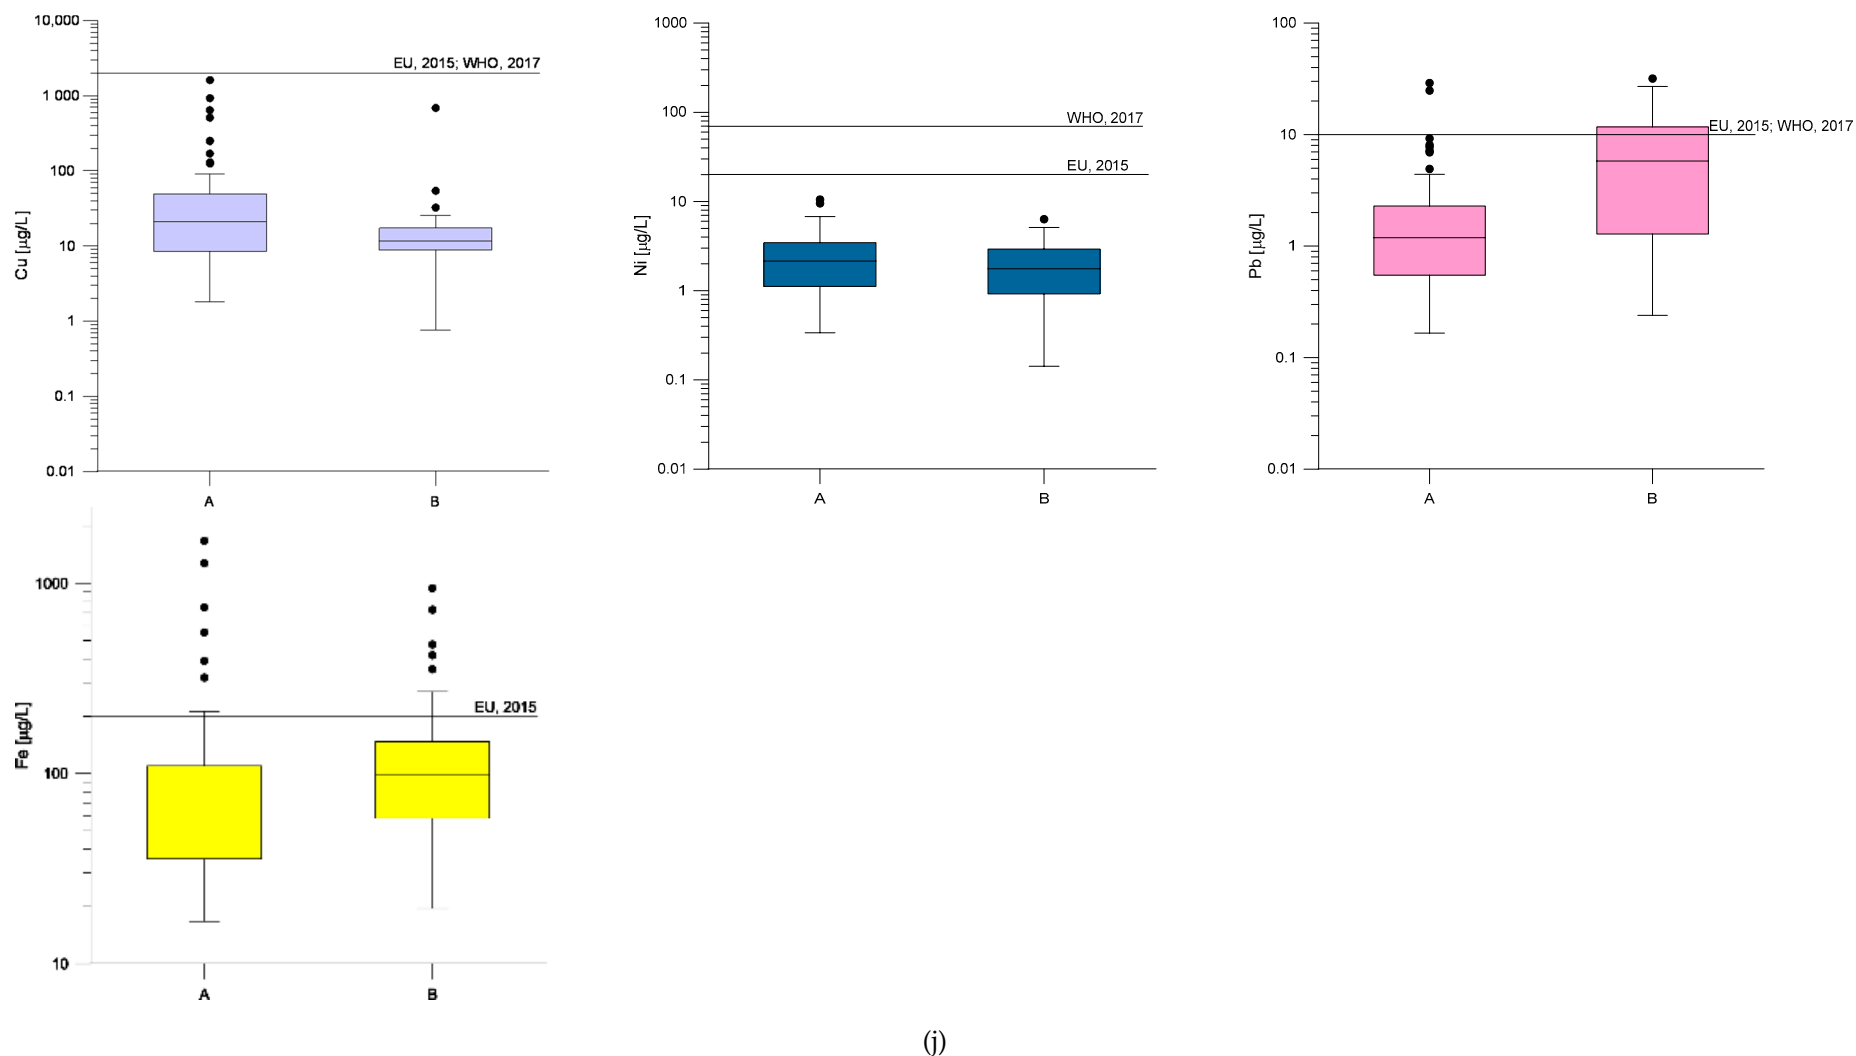

**Figure S1.** Trace elements concentrations in the analysed water by different categories of factors. (a) City: A—Kraków, B—Jaworzno, C—Kamienna Góra, D—Racibórz, E—Myszków. (b) Type of building: A—public building, B—house, C—flat. (c) Age of connection: A—<10 years, B—10–30 years, C—>30 years. (d) Age of tap: A—<10 years, B—10–30 years, C—>30 years. (e) Age of pipe-work: A—<10 years, B—10–30 years, C—>30 years. (f) Stagnation time: A—<1 hour,

B—>1 hour. (g) Material of connection: A—PCV, B—steel, C—galvanised steel, D—stainless steel, E—other. (h) Material of pipe-work: A—PCV, B—steel, C—galvanised steel, D—stainless steel, E—copper, F—other. (i) Material of appliance: A—steel, B—other. (j) Water rating by end-user: A—good, B—unacceptable.
